# Supplementary material for: A tailor-made design of lipidic bicontinuous cubic matrices using amino acid ionic liquids as self-assembly media
Source: Royal Society of Chemistry journal article supplement (doi:10.1039/c8me00015h), 2018-01-01
Supplement: c8me00015h1.pdf [file c8me00015h1.pdf]

## Tailor-made design of lipidic bicontinuous cubic matrices by using amino acid ionic liquids as self-assembly media

Saki Fujiwara,<sup>a,b</sup> Hiroyuki Ohno,<sup>a,b</sup> and Takahiro Ichikawa<sup>\*,a,b</sup>

<sup>a</sup>Department of Biotechnology, Tokyo University of Agriculture and Technology, Nakacho, Koganei, Tokyo 184-8588, Japan

<sup>b</sup>Functional Ionic Liquid Laboratories, Graduate School of Engineering, Tokyo University of Agriculture and Technology, Koganei, Japan

### Characterization of AAILs

[Ch][Asp]: <sup>1</sup>H NMR (400 MHz, D<sub>2</sub>O)  $\delta$  = 4.06-4.04 (m, 2H), 3.90-3.86 (m, 1H), 3.51 (t,  $J$  = 5.0 Hz, 2H), 3.19 (s, 9H), 3.69-2.62 (m, 2H). <sup>13</sup>C NMR (100 MHz):  $\delta$  = 180.25, 177.00, 70.11, 58.30, 56.56, 54.93, 39.30. Elemental analysis: Calculated for C<sub>9</sub>H<sub>20</sub>N<sub>2</sub>O<sub>5</sub> + 0.80 H<sub>2</sub>O: C, 43.12; H, 8.69; N, 11.18; C/N ratio, 3.86. Found: C, 43.16; H, 8.69; N, 11.38; C/N ratio, 3.79.

[Ch][Glu]: <sup>1</sup>H NMR (400 MHz, D<sub>2</sub>O)  $\delta$  = 4.07-4.03 (m, 2H), 3.75-3.72 (m, 1H), 3.51 (t,  $J$  = 5.0 Hz, 2H), 3.19 (s, 9H), 2.36-2.32 (m, 2H), 2.16-2.00 (m, 2H). <sup>13</sup>C NMR (100 MHz):  $\delta$  = 184.06, 177.41, 70.18, 58.37, 57.42, 56.63, 36.27, 29.81. Elemental analysis: C<sub>10</sub>H<sub>22</sub>N<sub>2</sub>O<sub>5</sub> + 0.50 H<sub>2</sub>O: C, 46.32; H, 8.94; N, 10.80; C/N ratio, 4.29. Found: C, 46.53; H, 9.09; N, 10.86; C/N ratio, 4.28.

[Im][Asp]: <sup>1</sup>H NMR (400 MHz, D<sub>2</sub>O)  $\delta$  = 7.49 (d,  $J$  = 2.4 Hz, 1H), 7.44 (d,  $J$  = 2.4 Hz, 1H), 4.38 (t,  $J$  = 5.0 Hz, 2H), 3.90 (s, 3H), 3.87 (t,  $J$  = 3.6 Hz, 1H), 3.82 (t,  $J$  = 4.8 Hz, 2H), 3.37 (s, 3H), 2.83-2.62 (m, 2H). <sup>13</sup>C NMR (100 MHz):  $\delta$  = 180.26, 176.98, 139.07, 126.24, 125.19, 72.51, 60.89, 54.95, 51.59, 39.29, 38.40. Elemental analysis: C<sub>11</sub>H<sub>19</sub>N<sub>3</sub>O<sub>5</sub> + 1.20 H<sub>2</sub>O: C, 44.80; H, 7.31; N, 14.25; C/N ratio, 3.14. Found: C, 44.73; H, 7.54; N, 14.43; C/N ratio, 3.10.

[Im][Glu]: <sup>1</sup>H NMR (400 MHz, D<sub>2</sub>O)  $\delta$  = 7.50 (d,  $J$  = 2.4 Hz, 1H), 7.44 (d,  $J$  = 2.4 Hz, 1H), 4.39 (t,  $J$  = 4.8 Hz, 2H), 3.89 (s, 3H), 3.83 (t,  $J$  = 5.2 Hz, 2H), 3.74 (t,  $J$  = 6.0 Hz, 1H), 3.38 (s, 3H), 2.37-2.32 (m, 2H), 2.17-2.01 (m, 2H). <sup>13</sup>C NMR (100 MHz):  $\delta$  = 183.96, 177.23, 139.07, 126.24, 125.19, 72.51, 60.90, 57.36, 51.59, 38.41, 36.20, 29.67. Elemental analysis: C<sub>12</sub>H<sub>21</sub>N<sub>3</sub>O<sub>5</sub> + 0.65 H<sub>2</sub>O: C, 48.20; H, 7.52; N, 14.05; C/N ratio, 3.43. Found: C, 47.98; H, 7.33; N, 14.32; C/N ratio, 3.35.

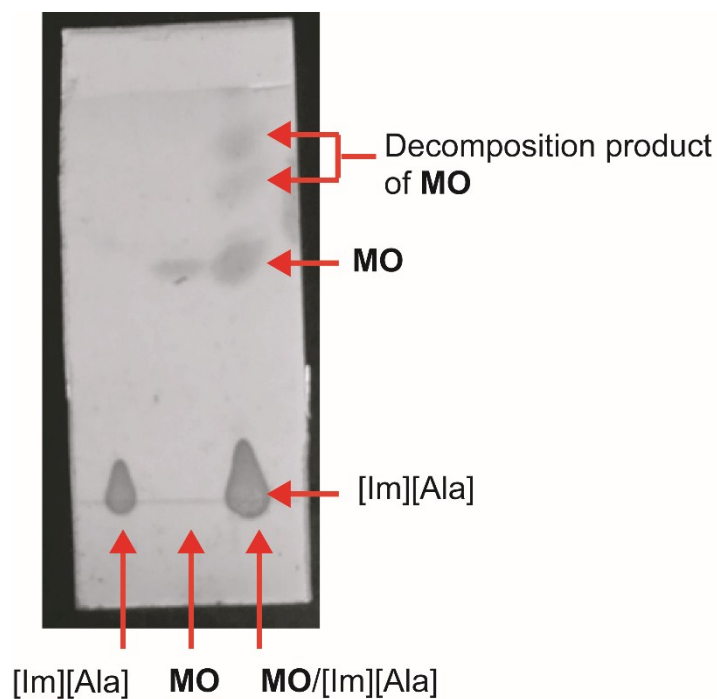

**Fig. S1.** Thin-layer chromatography (TLC) analysis of [Im][Ala], **MO**, and **MO**/[Im][Ala] mixture. Chloroform/methanol (90/10, v/v) was used as an eluent.

**Table S1** Glass transition temperature ( $T_g$ ) of AAILs.

| AAIL      | $T_g / ^\circ\text{C}$ |
|-----------|------------------------|
| [Ch][Asp] | -16                    |
| [Ch][Glu] | -17                    |
| [Im][Asp] | -23                    |
| [Im][Glu] | -19                    |

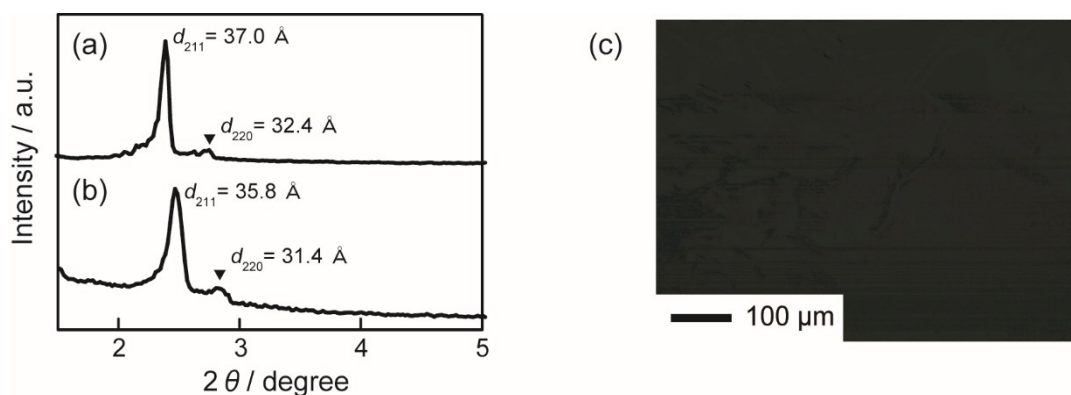

**Fig. S2** (a) X-ray diffraction pattern of the **MO**/[Im][Glu] mixture (80/20 by wt%) in the  $Q_{II}$  phase at room temperature. This sample was prepared by vacuuming for 5 hours and left for 1 month without cover glass under laboratory condition. (b) X-ray diffraction pattern of the **MO**/[Im][Glu] mixture (80/20 by wt%) prepared by vacuuming for 24 hours in the  $Q_{II}$  phase at room temperature. (c) Polarizing optical image of **MO**/[Im][Glu] (80/20 by wt%) in the  $Q_{II}$  phase at room temperature. This sample was prepared by vacuuming for 5 hours and left for 1 month without cover glass under laboratory condition.

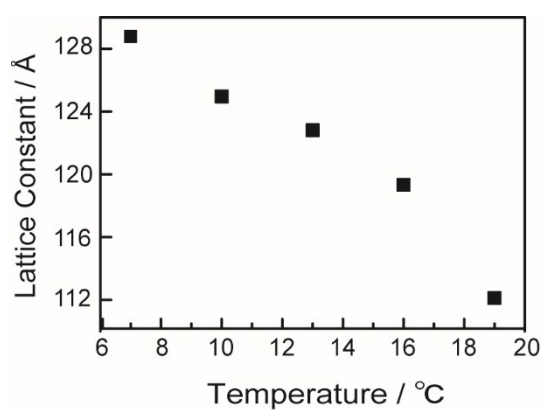

**Fig. S3** Change of the cubic lattice constant of the **MO**/[Im][Glu] mixture (80/20 by wt%) in low temperature region.

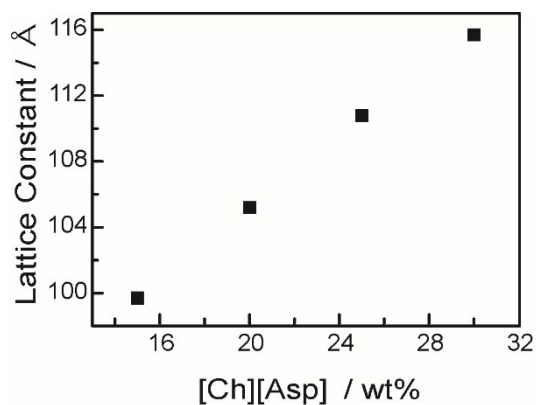

**Fig. S4** Cubic lattice constant of the **MO**/[Ch]/[Asp] mixture (80/20 by wt%) against the component ratio of [Ch]/[Asp].

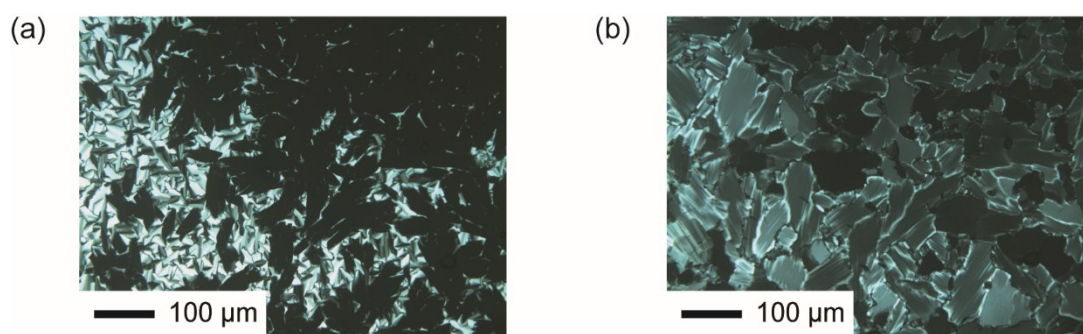

**Fig. S5** (a) Polarizing optical image of the **MO**/[Ch]/[Asp] mixture (80/20 by wt%) from the  $H_{II}$  to  $Q_{II}$  phases at 36 °C on cooling. (b) Polarizing optical image of the **MO**/[Ch]/[Asp] mixture (80/20 by wt%) from the  $Q_{II}$  to  $H_{II}$  phases at 41 °C on heating.

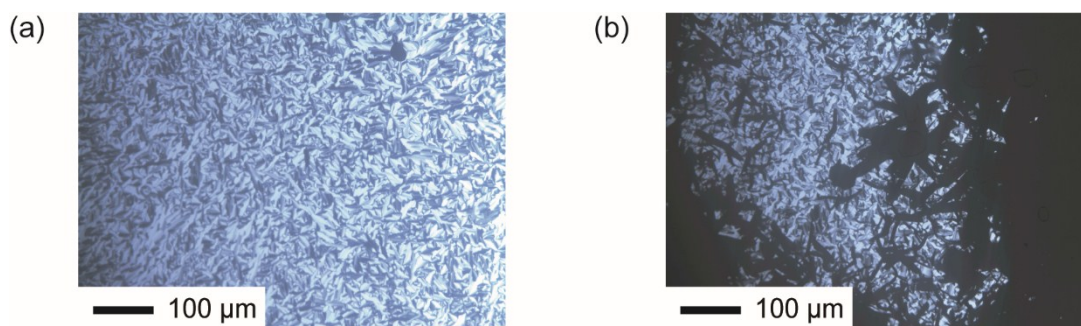

**Fig. S6** (a) Polarizing optical image of the **MO**/[Ch]/[Glu] mixture (90/10 by wt%) in the  $H_{II}$  at 44 °C on cooling. (b) Polarizing optical image of the **MO**/[Ch]/[Glu] mixture (90/10 by wt%) from the  $H_{II}$  to  $Q_{II}$  phases at 12 °C on cooling.

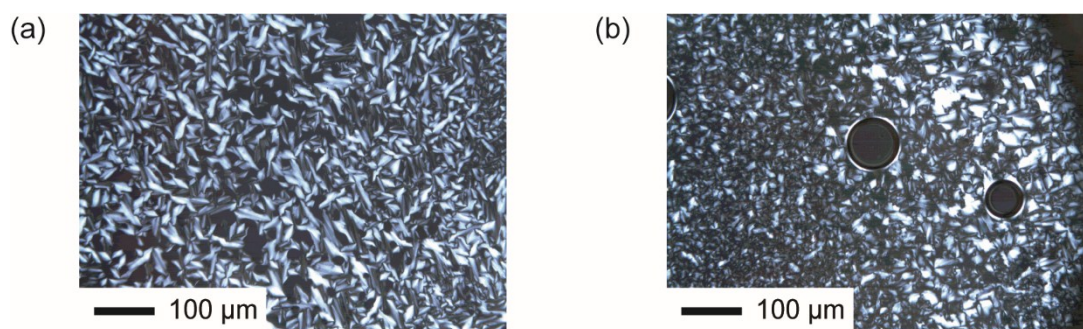

**Fig. S7** (a) Polarizing optical image of the **MO**/[Im][Asp] mixture (70/30 by wt%) in the  $L_{\alpha}$  phase at 104 °C on cooling. (b) Polarizing optical image of the **MO**/[Im][Asp] mixture (50/50 by wt%) in the  $L_{\alpha}$  phase at 128 °C on cooling.

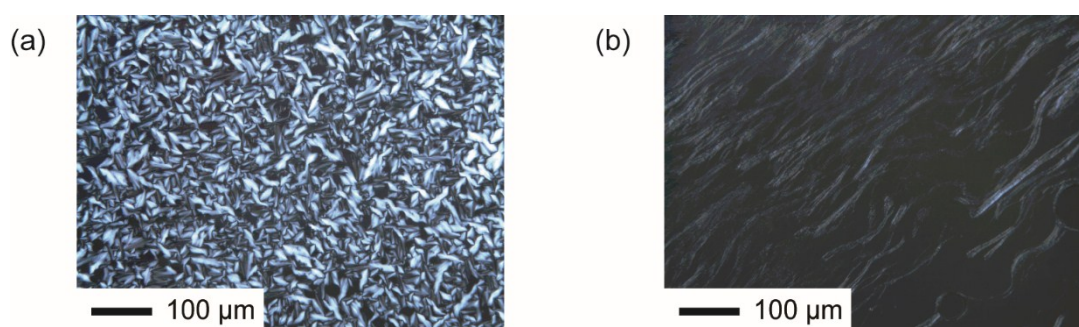

**Fig. S8** (a) Polarizing optical image of the **MO**/[Im][Glu] mixture (70/30 by wt%) in the  $L_{\alpha}$  phase at 93 °C on cooling. (b) Polarizing optical image of the **MO**/[Im][Asp] mixture (60/40 by wt%) in the  $L_{\alpha}$  phase at 101 °C after shearing. An oil streak texture, indicative of the formation of a  $L_{\alpha}$  phase, was observed.

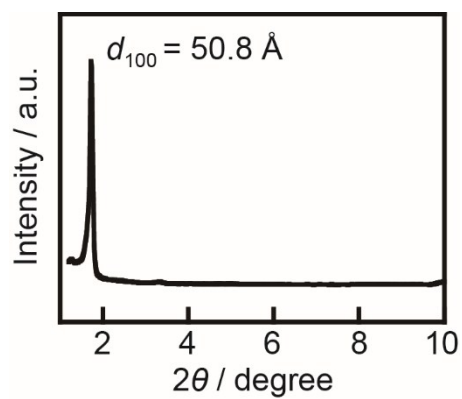

**Fig. S9** X-ray diffraction pattern of the **MO**/[Ch][Glu] mixture (50/50 by wt%) in the  $L_\alpha$  phase at 60 °C.

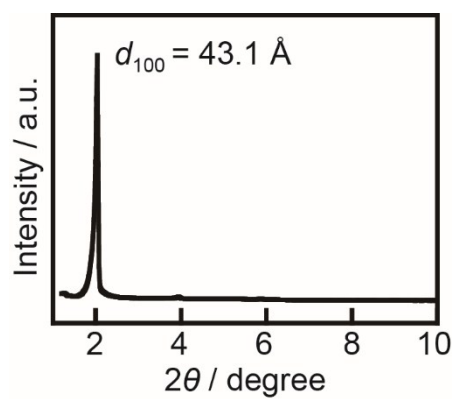

**Fig. S10** X-ray diffraction pattern of the **MO**/[Im][Glu] mixture (50/50 by wt%) in the  $L_\alpha$  phase at room temperature.
